# Independence and interaction between the control of moving and holding still in post-stroke arm paresis

Alkis M. Hadjiosif<sup>1,2\*</sup>, Kahori Kita<sup>1,3</sup>, Scott T. Albert<sup>4,5</sup>, Robert A. Scheidt<sup>6</sup>, Reza Shadmehr<sup>4</sup>, and John W. Krakauer<sup>1,7,8,9</sup>

<sup>1</sup> Department of Neurology, Johns Hopkins University, Baltimore MD

<sup>2</sup> John A. Paulson School of Engineering and Applied Sciences, Harvard University, Cambridge MA

<sup>3</sup> Kyoto University School of Medicine, Kyoto Japan

<sup>4</sup> Department of Biomedical Engineering, Johns Hopkins University, Baltimore MD

<sup>5</sup> University of North Carolina School of Medicine, Chapel Hill NC

<sup>6</sup> Department of Biomedical Engineering, Marquette University, Milwaukee WI

<sup>7</sup> Department of Neuroscience, Johns Hopkins University, Baltimore MD

<sup>8</sup> Department of Physical Medicine and Rehabilitation, Johns Hopkins University, Baltimore MD

<sup>9</sup> Santa Fe Institute, Santa Fe, NM

\* Corresponding Author, [alkis@seas.harvard.edu](mailto:alkis@seas.harvard.edu)

## 1 **Abstract**

2 Moving and holding still have been posited to be under separate control regimes for both eye and  
3 arm movements. The paretic arm after stroke is notable for abnormalities both at rest and during  
4 movement, thus it provides an opportunity to address the relationships between control of  
5 reaching, stopping and stabilizing. Here, we asked whether independence of these behaviors is  
6 preserved in arm paresis. To address this question, we quantified resting postural abnormalities  
7 in stroke patients by measuring their biases in force production as they held their hand still in  
8 various locations in a planar workspace, and then assessed the influence of these resting force  
9 biases on active reaching in the same workspace. We found that patients had marked resting  
10 postural force biases at each location. However, these biases did not manifest during any phase  
11 of planar reaching movements in the setting of weight support: not during initial acceleration, not  
12 to mid-trajectory perturbations, and not during deceleration to a stop. Resting force biases only  
13 appeared to switch on after a movement had fully stopped. These findings in stroke suggest that  
14 moving and holding still are functionally separable modes of control. At the same time, we found  
15 that patients' resting postural force biases mirrored characteristics of abnormal synergies active  
16 during movement: they markedly decreased when arm support was provided; they were higher in  
17 more distal positions which require breaking out of flexion; and they scaled with the Fugl-Meyer  
18 score for the upper extremity (a measure of intrusion of abnormal synergies during active

19 movement). These three shared features suggest a common mechanism for resting postural  
20 biases and abnormal synergies, which appears to be a contradiction given the functional  
21 separation of moving and holding still observed in the same patients. To resolve this apparent  
22 paradox, we propose a model that predicts a breakdown in the functional separation between  
23 reaching and holding still when patients move in the absence of weight support. Thus, the model  
24 posits that synergies are the behavioral manifestation of a spillover of posture into movement.  
25 Mapping these functional systems onto anatomical and physiological details of lesioned substrate  
26 after stroke may provide implementation-level insight into how normal arm motor control is  
27 assembled.

## 28 **Introduction**

29 A longstanding idea in motor control is that moving and holding still rely upon separate control  
30 regimes. This separation was demonstrated in the context of eye movement control by the classic  
31 work of Robinson (Robinson 1970). Other work suggests this separation may extend to other  
32 effectors (Shadmehr 2017). In particular, substantial behavioral (Ghez, Scheidt, and Heijink 2007;  
33 2007) and physiological (Kurtzer, Herter, and Scott 2005; Shalit et al. 2012) evidence supports  
34 the idea that a similar dissociation governs the control of reaching and holding still for the arm  
35 (Jayasinghe, Scheidt, and Sainburg 2022).

36 Patients with hemiparesis after stroke typically exhibit deficits in the control of both reaching and  
37 holding still (Zackowski et al. 2004; Trombly 1992; Levin 1996; Garland, Gray, and Knorr 2009),  
38 making hemiparesis a potent model for understanding the interaction, or dissociation, between  
39 these two modes of motor control. There is evidence, for example, that reaching and holding  
40 might be differentially affected after stroke depending on lesion side (Mani et al. 2013; Schaefer,  
41 Haaland, and Sainburg 2009).

42 Here, we focused on one particular aspect of holding still: resting at a position. One of the most  
43 common and readily recognizable motor symptoms after stroke is abnormal resting posture  
44 (Twitchell 1951). For example, the typical hemiparetic arm posture consists of flexion at the  
45 fingers, wrist, and elbow (Carr and Kenney 1992) (Figure 1A). Prominent approaches for the  
46 treatment of hemiparesis have been based on the idea that abnormal resting posture has a direct  
47 deleterious effect upon movement control; they advocated for adjusting overall posture in ways  
48 that may minimize such effects (Carr and Kenney 1994; 1992; Bobath 1982).

49 Our main aim was to determine whether resting abnormalities bleed over into active movements  
50 in the post-stroke arm. This is of great interest because the ability to separate moving from holding  
51 may be precisely what is lost after stroke, and hence postural abnormalities could contaminate  
52 voluntary movement. If this is indeed the case, it might lend credence to the idea in rehabilitation  
53 that treating resting abnormalities can benefit movements.

54 In Experiment 1, we assessed resting postural abnormalities by measuring the abnormal resting  
55 postural force biases of cerebral stroke patients in a planar workspace. We investigated how  
56 these force biases varied with arm position, presence of arm support, and overall motor  
57 impairment. In Experiment 2, we proceeded to assess patients' motor control of reaching and  
58 holding in the same workspace. We separately investigated effects upon the initial reach and  
59 bringing the reach to a stop, as these two might be separately controlled (Ghez, Scheidt, and

60 Heijink 2007; Scheidt and Ghez 2007). We also investigated active holding control *after* the  
61 movement was over, by examining responses to perturbations that attempted to move the arm  
62 off the target, in order to confirm that the same controller is engaged for both passive (as in  
63 Experiment 1) and active holding at the same position.

## 64 Results

### 65 *Patients showed resting flexor biases across the workspace*

66 We first assessed post-stroke resting postural abnormalities across a 2D workspace. In  
67 Experiment 1, participants grasped the handle of a robotic arm, which passively moved their hand  
68 to a series of positions that sampled the workspace in front of them (the setup and example  
69 workspace are shown in Figure 1C,D). Participants were instructed to maintain grasp, but  
70 otherwise relax their arm and not resist the actions of the robotic arm. Once the participant's arm  
71 was passively moved to a given position, the robotic arm would hold still for 5 seconds, enabling  
72 us to measure the forces involuntarily exerted by the participant as their hand was held at that  
73 location. Each experiment block consisted of three visits to each of about 15-25 positions sampled  
74 for each participant, in random order. Participants completed four different experiment blocks: two  
75 with each arm, with or without arm weight support (provided by an air sled, Figure 1C).

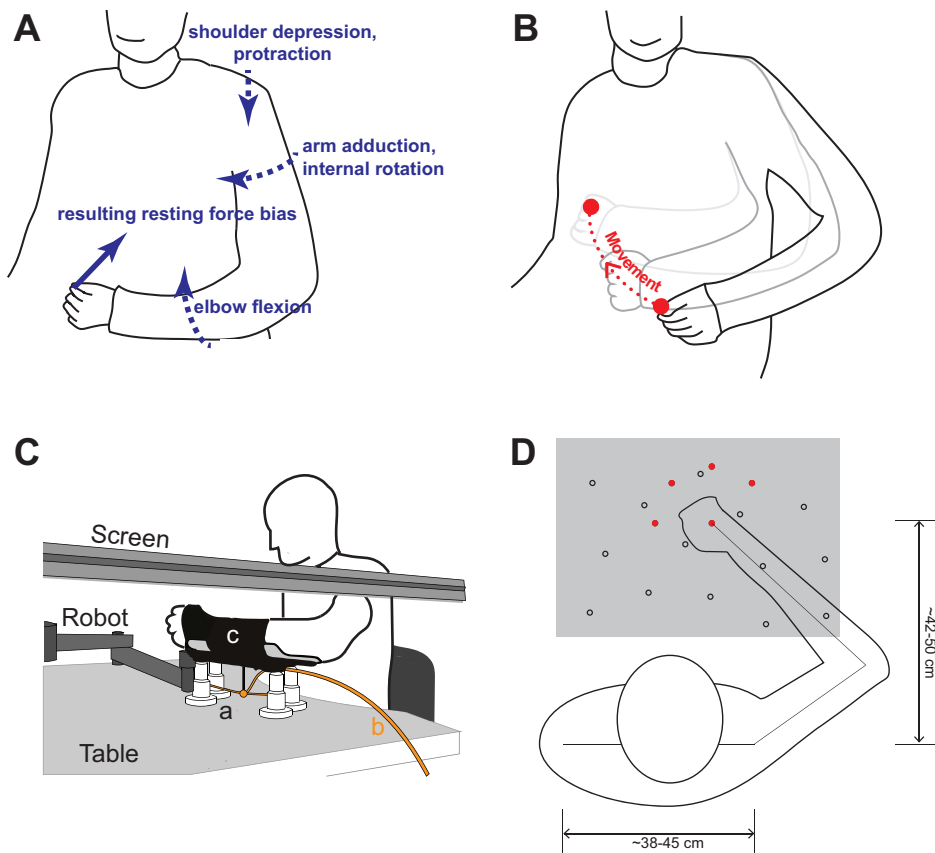

76

77 **Figure 1: Conceptual framework and experiment setup.** **A:** A patient exhibiting a typical flexor posture at  
78 rest. Dashed arrows indicate elements of the posture: shoulder depression, arm adduction/internal rotation,  
79 elbow flexion. The torques involved in each component of the abnormal resting posture translate to a force  
80 on the hand (blue arrow); we thus designed an experiment to measure the resting force bias on the hand,

81 as a marker of the overall postural abnormality. The goal was to compare resting postural force biases to  
 82 active movement control in the same area (**B**). **C**: Experiment setup. The participant holds the handle of  
 83 the robotic arm; reach targets and cursor position are projected on a screen on top; for arm support, the  
 84 participant's arm is strapped on an armrest (**c**) connected to an air sled (**a**) which rests on the table. Air is  
 85 provided through tube labeled (**b**). **D**: Top-down view of setup, illustrating the different hand positions where  
 86 resting postural forces were measured in Experiment 1 (open circles). Also shown are the five target  
 87 positions used in the reaching and holding task for Experiment 2 (filled red circles). The gray box indicates  
 88 the workspace depicted in Figure 2.

89

90 Patients displayed abnormal postural force biases as the hand was held still at various locations  
 91 across the workspace. Figure 2 shows examples of this for three patients and a typical healthy

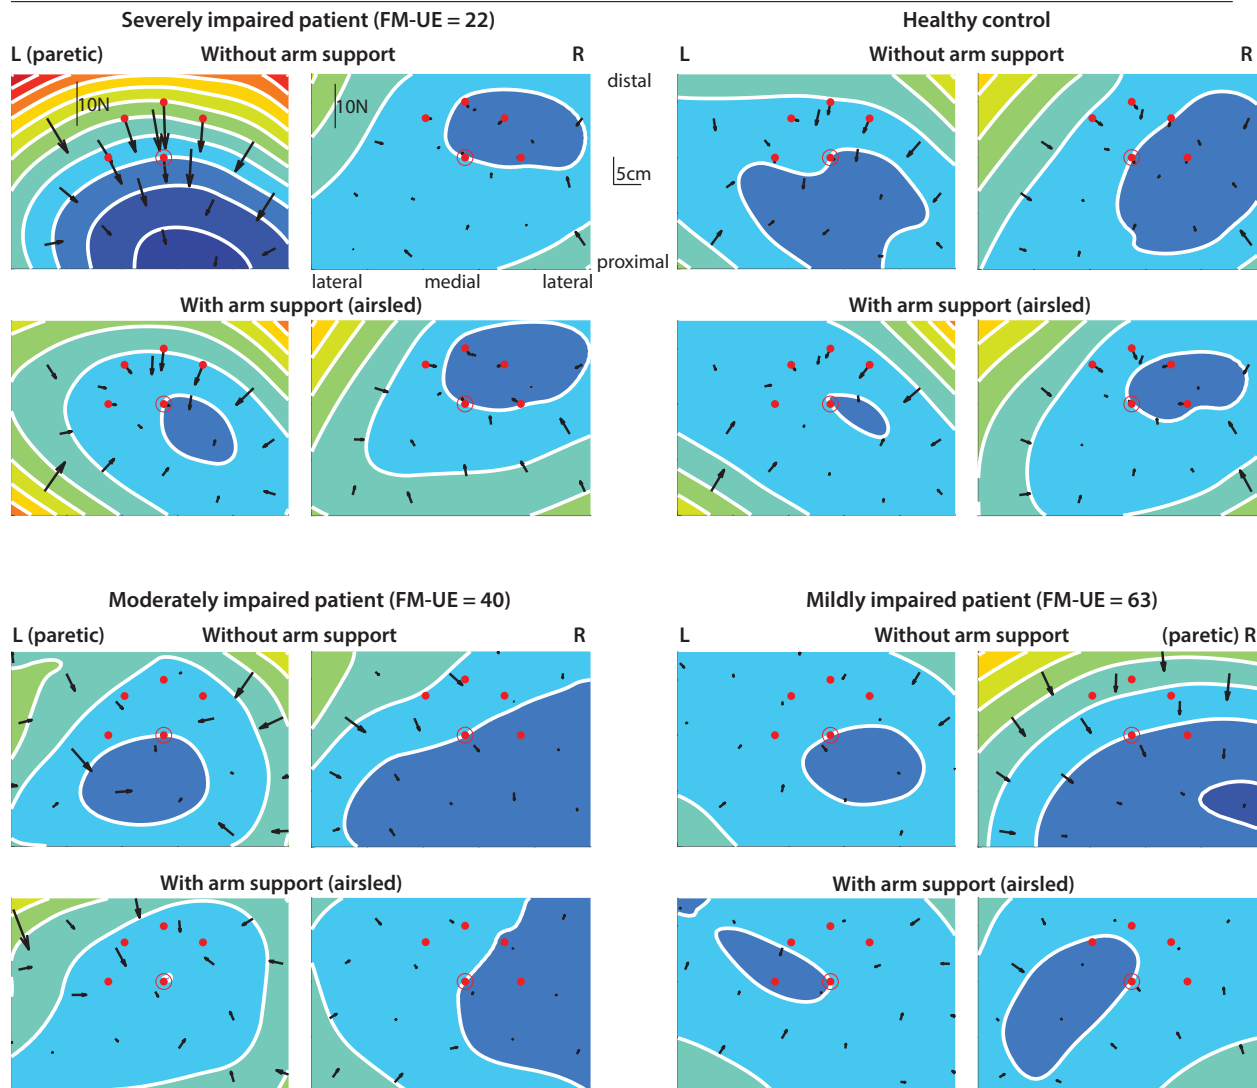

92

93 **Figure 2:** Examples of resting postural force biases. Shown are three stroke patients and one healthy

94 control. Arrows indicate magnitude and direction of abnormal resting postural forces as measured at the  
95 hand at each location. Isoclines indicate gradations in force magnitude; different colors indicate different  
96 force levels based on these gradations. The red dots are the reach targets, with the center location circled  
97 (used in Experiment 2). Note how abnormalities in the paretic side are considerably stronger when arm  
98 support is removed. FM-UE: Fugl-Meyer score for the Upper Extremity (0-66).

99

100 control participant. The non-paretic arm produced little to no postural force biases, whereas the  
101 paretic arm produced substantial postural force biases, particularly when the hand was held in a  
102 more distal position. The postural force biases were strongest when participants had to support  
103 the weight of the arm against gravity. Moreover, the patient with the highest degree of impairment  
104 (top left subplot of Fig. 2, as assessed using the Fugl-Meyer score for the Upper Extremity, FM-  
105 UE (Fugl-Meyer et al. 1975)) exhibited the strongest resting postural abnormalities.

106 To aggregate results across all participants, we focused on five specific hand locations, illustrated  
107 by the red dots in Figure 2, and evaluated the corresponding abnormal resting postural force  
108 biases. These locations were chosen as they were within the sampled workspace of all  
109 participants (as this workspace could differ from one participant to the next), contained both distal  
110 and proximal targets, and, importantly, they were also the movement targets used in Experiment  
111 2. Figure 3A shows subject-averaged resting postural forces at each of these five positions and

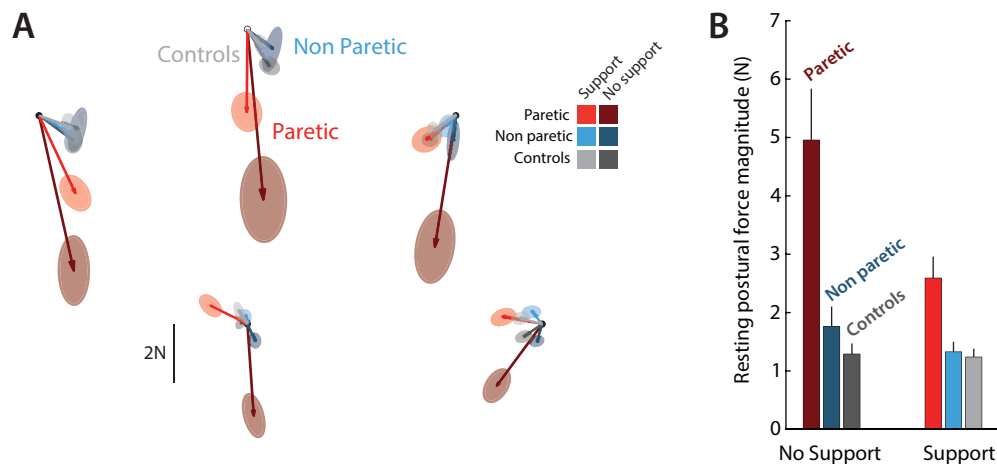

112

113 **Figure 3: Average resting postural force biases. A:** Average resting postural forces for the paretic (red) and  
114 non-paretic (cyan) arms of patients, as well as control participants (gray), illustrating how abnormal forces  
115 in the paretic arm are stronger in more distal targets and attenuated when arm support is provided (lighter  
116 shades). To average across left- and right-hemiparetic patients, left-arm forces were flipped left to right. **B:**  
117 corresponding average resting postural force magnitudes.

118 Figure 3B shows the corresponding force magnitudes averaged across subjects and the five  
119 positions. We made two key observations: first, postural force biases were stronger in locations  
120 further away from the body and tended to point towards it; second, postural force biases were  
121 roughly halved in magnitude when arm support was provided.

122 *Examining motor control in the same workspace allows us to differentially probe mechanisms of*  
123 *reaching and holding*

124 In Experiment 2, we sought to investigate whether resting postural force biases influence active  
125 reaching and holding still in the same workspace. We measured effects upon the initial reach  
126 (Figure 4, blue) and bringing the reach to a stop (Figure 4, red), as it has been suggested that  
127 these two are separately controlled (Scheidt and Ghez 2007; Ghez, Scheidt, and Heijink 2007);  
128 see also (Karst and Hasan 1991; Lestienne 1979). We also asked whether the same controller is  
129 engaged while being passively held at a position (as in Experiment 1) vs. actively holding at the  
130 same position. For this purpose, we examined active holding control *after* the movement was over  
131 (Figure 4, black), using perturbations that attempted to push the arm off the target.

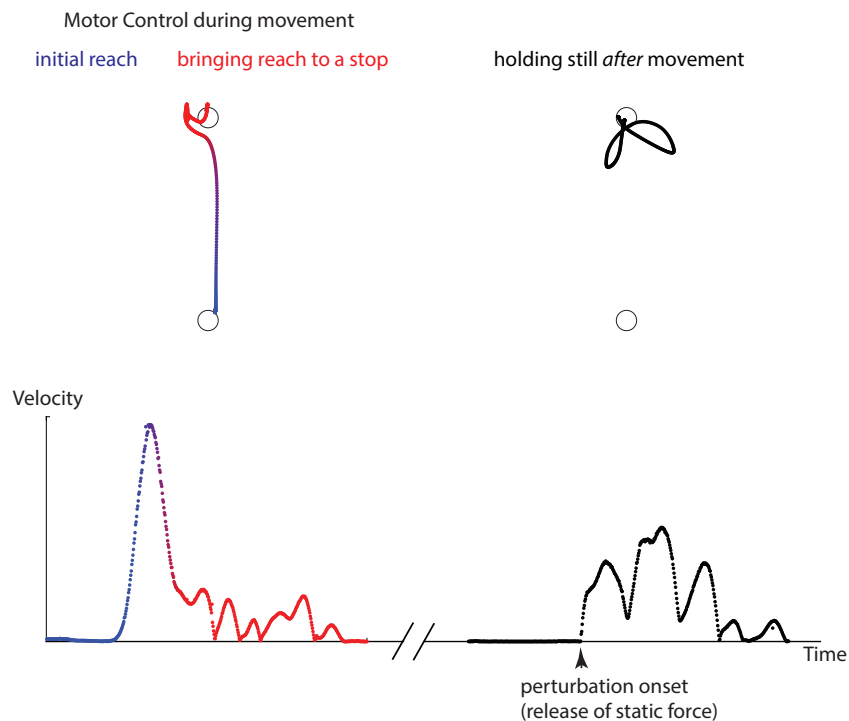

132

133 **Figure 4:** *Three aspects of active motor control that we tested in Experiment 2.* We separately examined  
134 the early part of the reaching movement (blue) and the late part, when the arm was coming to a stop (red).  
135 This was done by studying both unperturbed movements at different stages and movements that were  
136 perturbed with brief force pulses. In addition, we examined active holding control after the movement was



137 over (black), using perturbations that tried to move the arm away from the held point. Shown is an example  
138 of trajectory and (absolute) velocity profiles from the reaching and coming-to-a-stop parts of a trial (left) and  
139 active holding against a perturbation after the trial was over (right).

140

#### 141 *Resting postural force biases did not affect the control of active reaching*

142 In Experiment 2, participants made 10-cm point-to-point reaching movements within an array of  
143 five positions (filled circles in Figure 1D), for a total of 8 different movement directions (Figure 5A).  
144 Arm support was provided by the air sled (Figure 1C). Patients' movements were generally  
145 impaired, taking more time and traveling a longer path to reach the target than controls (Time to  
146 target:  $1.59 \pm 0.12$ s for patients' paretic side vs.  $0.82 \pm 0.03$ s for controls,  $p = 0.00006$ ; Path traveled  
147 to target  $13.4 \pm 0.6$ cm for patients' paretic side vs.  $10.8 \pm 0.2$ cm for controls,  $p = 0.0071$ , Fig. 5B,C).

148 We then examined whether patients' movements reflected the resting postural biases measured  
149 in Experiment 1 in the same workspace. Would there, for example, be a difference when moving  
150 the arm through a high-postural bias area vs. a low-postural bias area? We examined effects of  
151 resting postural biases upon the initial reach vs. the approach to a hold position, as separate  
152 mechanisms may be involved in the control of each phase of movement (Scheidt and Ghez 2007;  
153 Ghez, Scheidt, and Heijink 2007; Sainburg, Ghez, and Kalakanis 1999; Karst and Hasan 1991;  
154 Hannaford and Stark 1985); thus, resting postural biases might affect one phase but not the other.  
155 Specifically, we examined: (a) whether the direction of resting postural forces at the start position  
156 influenced trajectory deviations near the beginning of the movement (Figure 5D) or (b) whether  
157 direction of resting postural forces at the end position influenced trajectory deviations near the  
158 end of the movement (Figure 5G, after the participant reached within 2cm of the target).

159 To investigate within-subject effects, we selected, for each patient, the two movement directions  
160 for which the corresponding postural forces had strongest opposing effects – i.e. the most  
161 rightwards (CW) vs. most leftwards (CCW) with respect to movement direction. The idea behind  
162 picking the most extreme values for each individual was to maximize our sensitivity in detecting  
163 potential effects of resting postural forces upon active movement. Our analysis found no  
164 significant differences in directional biases between these two conditions: while the selected start-  
165 point force biases differed considerably between the most CCW and CW cases ( $1.8 \pm 0.4$ N vs. -  
166  $1.8 \pm 0.3$ N, correspondingly [negative signs indicating CW forces],  $t_{15} = 6.24$ ,  $p = 0.00002$ ), the  
167 corresponding initial angular deviations did not ( $0.4 \pm 2.1^\circ$  for the most CCW vs.  $-0.6 \pm 2.3^\circ$  for the  
168 most CW postural force,  $t_{15} = 0.27$ ,  $p = 0.79$ , Figure 5I-K). Similarly, while the selected end-point  
169 force biases also differed considerably ( $1.8 \pm 0.3$ N vs.  $-1.8 \pm 0.4$ N, for the most CCW vs. CW cases,

170  $t_{15}=6.24$ ,  $p=0.00002$ ), the corresponding endpoint angular deviations did not ( $4.4\pm 2.4^\circ$  for the most  
 171 CCW vs.  $5.2\pm 2.6^\circ$  for the most CW postural force,  $t_{15}=0.30$ ,  $p=0.77$ , Figure 5L-N). In summary,  
 172 our data thus provide no compelling support for the idea that resting postural abnormalities do not  
 173 directly affect active movement.

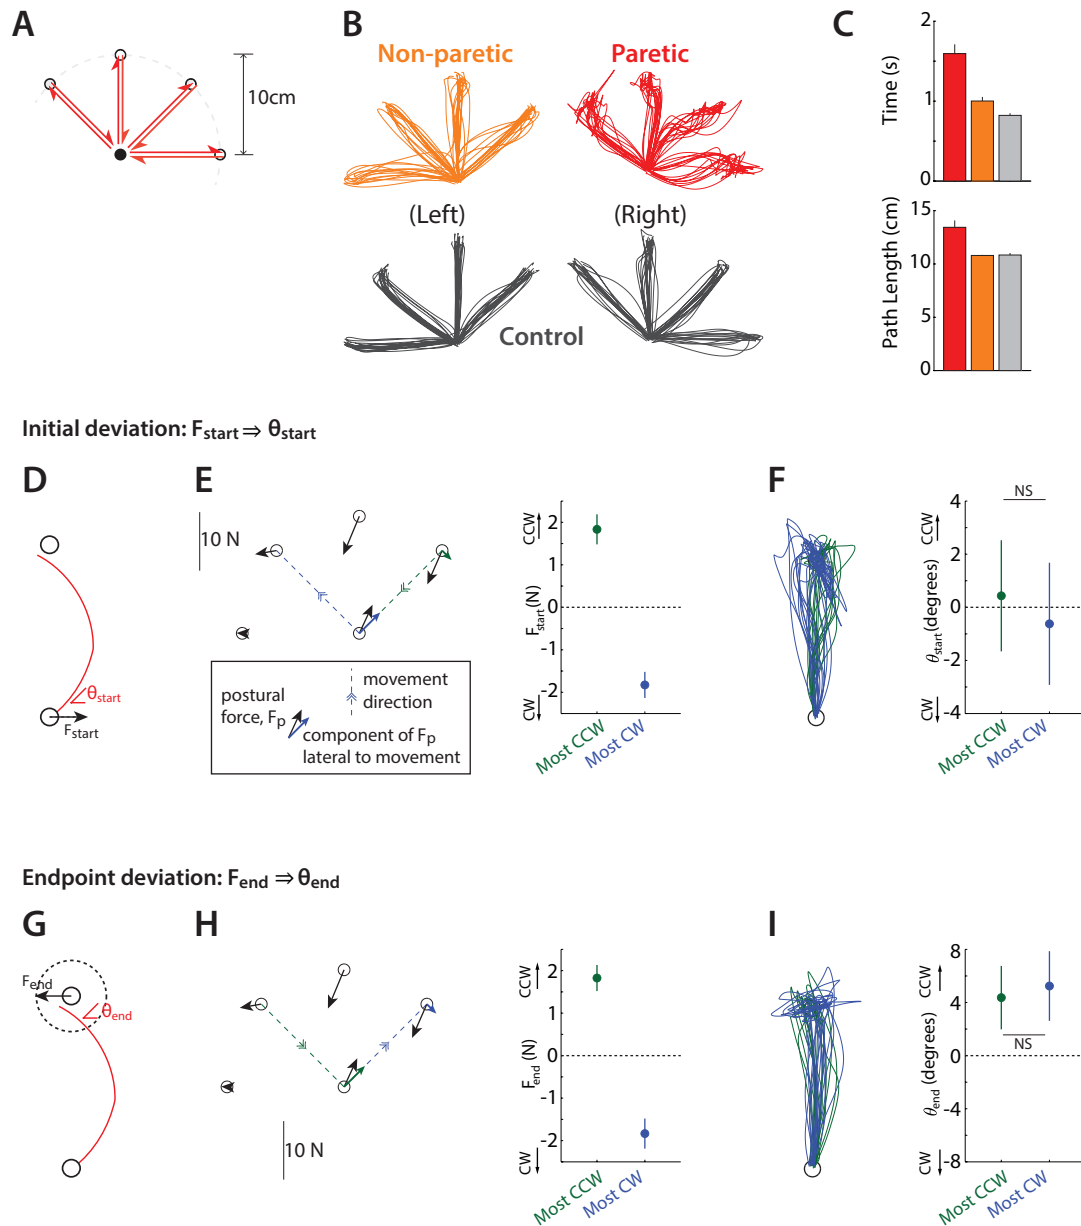

174

175 **Figure 5: Abnormal resting postural force biases do not interact with active reaching.** **A:** Target array for  
 176 Experiment 2 (movement task), illustrating the 5 start/end points of reaches and the 8 movement directions.  
 177 **B:** Example outwards trajectories (unperturbed trials) for a patient (orange: non-paretic side; red: paretic  
 178 side) and a healthy control (gray). **C:** Subject-averaged reach performance based on either time (top) or  
 179 path length to target (bottom) indicates impaired reaching control in patients' paretic side. **D-F:** Within-

180 subject analysis of whether resting postural forces at movement start bias early movement towards their  
181 direction. **E:** For each individual, we selected the direction where  $F_{\text{start}}$  was the strongest counterclockwise  
182 (CCW, green) or clockwise (CW, blue). The left panel shows this selection for an example participant:  
183 postural forces at start position were projected lateral to the movement direction, allowing us to select  
184 movement directions for which this component was directed the strongest CCW or CW. The right panel  
185 shows the magnitude of these selected components across all patients. **F:** Left: Corresponding movement  
186 trajectories (rotated so start position is at the bottom and end position at the top) for the directions selected  
187 for the same example participant. Right: Average initial angular deviations,  $\theta_{\text{start}}$ , for the selected directions  
188 for each participant, revealing no difference and thus no effect of  $F_{\text{start}}$  upon the movement. **G-I:** same as  
189 D-F but for endpoint resting postural forces,  $F_{\text{end}}$  and endpoint deviations,  $\theta_{\text{end}}$ . Errorbars indicate SEM.

190

### 191 *Resting postural force biases did not affect responses to perturbations during movement*

192 A potential limitation in our data and analysis above is that unperturbed reaching movements may  
193 provide limited sensitivity in detecting effects of resting postural force biases, as any such effects  
194 may be largely compensated by a predetermined motor plan. In that case, it may be better to  
195 directly compare these force biases to responses to less predictable, externally applied force  
196 perturbations. We thus further assessed how resting postural forces may affect responses to mid-  
197 movement perturbations. In 1/3 of randomly selected reaching movements in Experiment 2, we  
198 imposed a 70ms duration, 12-N force pulse lateral to the movement (Smith and Shadmehr 2005)  
199 2cm into the reach. Half of these pulses were clockwise (CW, blue in Figure 6A) and the other  
200 half were counter-clockwise (CCW, red in Figure 6A). We first verified that these pulses had a  
201 clear effect upon movement: perturbed movements took longer to complete in both patients  
202 (paretic movement time:  $1.72 \pm 0.13\text{s}$  vs.  $1.59 \pm 0.12\text{s}$ ,  $t_{15} = 5.31$ ,  $p = 0.00009$ ) and controls  
203 (movement time:  $0.88 \pm 0.03\text{s}$  vs.  $0.82 \pm 0.03\text{s}$ ,  $t_8 = 5.56$ ,  $p = 0.0005$ ). Patients generally had  
204 impaired response to these pulses compared to their non-paretic side and healthy controls,  
205 deviating further (maximum lateral deviation – paretic:  $2.5 \pm 0.1\text{cm}$  vs. non-paretic:  $2.1 \pm 0.1\text{cm}$  [ $p =$   
206  $0.0008$ ] and controls:  $2.1 \pm 0.1\text{cm}$  [ $p = 0.0357$ ] - average of CW and CCW pulses) and taking a  
207 longer time to stabilize in the pulse direction (i.e. minimize lateral velocity; paretic:  $1.15 \pm 0.06\text{s}$  vs.  
208 non-paretic:  $0.75 \pm 0.03\text{s}$  [ $p = 0.00002$ ] and controls:  $0.74 \pm 0.02\text{s}$  [ $p = 0.00003$ ]). This is illustrated in  
209 Figure 6B,C.

210 We then investigated whether resting postural forces played any role in patients' response to the  
211 pulse perturbation. We hypothesized that, should resting postural forces play a role, they would  
212 tend to reduce the effect of the pulse if they were in the opposite direction, and exaggerate it they

213 were in the same direction. We thus compared the lateral component of resting postural forces in  
 214 the start position against (a) the maximum lateral deviation in the direction of each pulse and (b)  
 215 the time taken to stabilize in the pulse direction (settling time). When we compared force  
 216 magnitude vs. maximum lateral deviation in pulse direction we found no relationship for either  
 217 CCW pulses ( $R^2=0.02$ ,  $p = 0.57$ ) or CW pulses ( $R^2=0.03$ ,  $p = 0.55$ ) as shown in Figure 6D, right.  
 218 Similarly, we found no relationship when comparing force magnitude vs. settling time (CCW  
 219 pulses:  $R^2=0.002$ ,  $p = 0.86$ , CW pulses:  $R^2=0.05$ ,  $p = 0.41$ , Figure 6D, left). In summary, our  
 220 analysis did not show any specific, consistent effects of resting posture upon the responses to  
 221 the pulse perturbations.

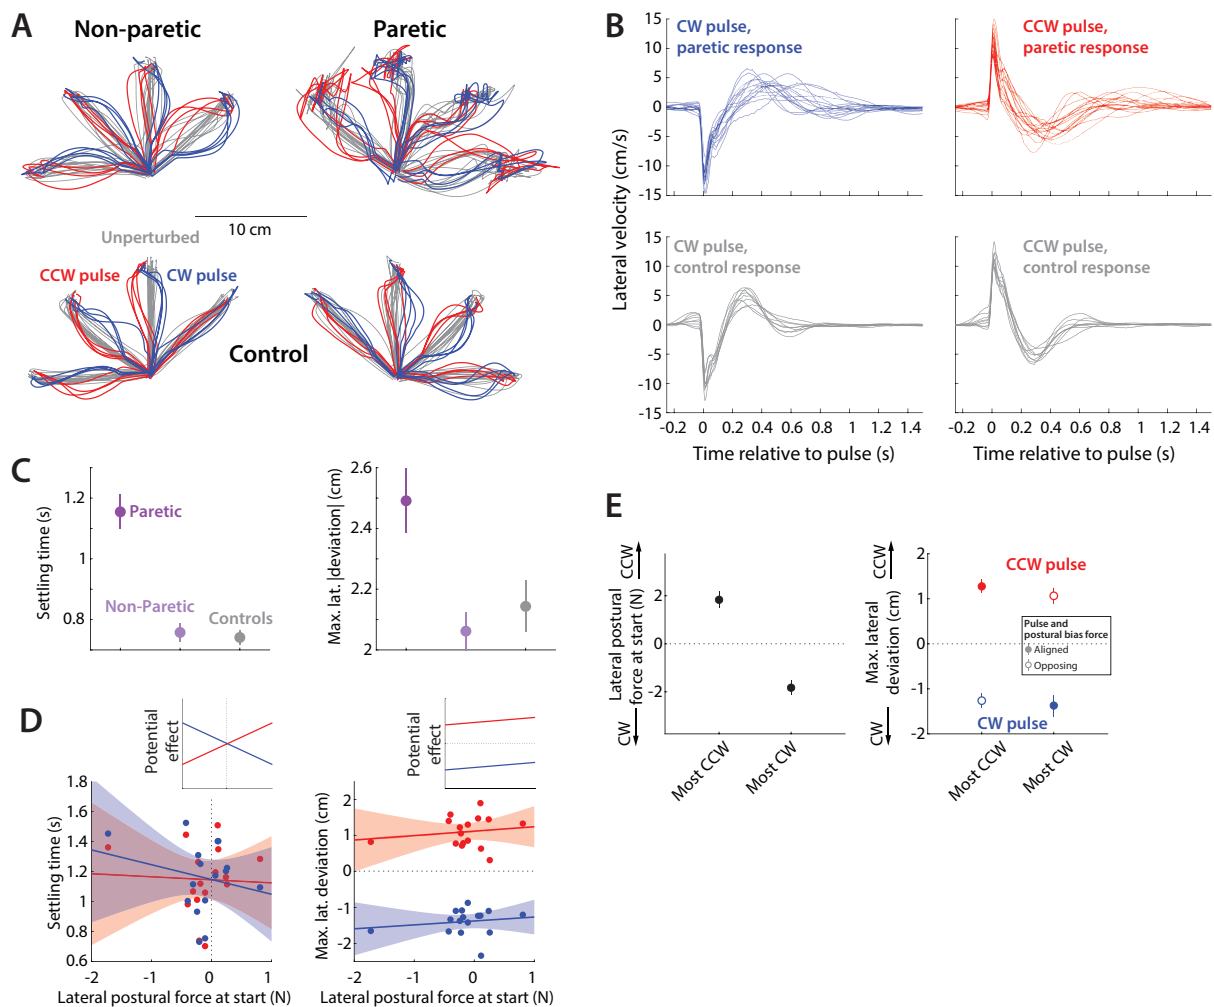

222

223 **Figure 6:** Responses to movement perturbations and relationship to resting postural forces. **A:** Examples  
 224 of perturbed (red: perturbed with CCW pulse; blue: perturbed with CW pulse) and unperturbed (gray)  
 225 outward trajectories - same individuals as in Figure 4B. **B:** Lateral velocity (positive: CCW to movement)  
 226 before and after pulse onset, and corresponding responses from controls (gray), illustrating how patients,

227 in response to the pulse, take longer time to settle and tend to experience larger lateral deviations  
228 compared to controls. **C:** Summary performance measures for patients and controls, indicating impaired  
229 performance with the paretic side: settling time (left) and maximum lateral deviation on pulse direction  
230 (right). **D:** Left: Across-patient comparison between settling time and lateral postural bias force on  
231 movement start. Inset indicates expected relationships if resting postural biases were affecting the response  
232 against the pulse. Paretic data shown. Red: CCW pulse; Blue: CW pulse. Right: similar to left, but for  
233 (signed) maximum lateral deviation for the two types of pulses. **E:** Within-individual analysis: here, for each  
234 individual, we selected the movements for which the starting-position resting postural force would be either  
235 the strongest CCW or CW (left); we then examined the corresponding maximum lateral deviations (right).  
236 Mirroring the analysis shown in D, any potential effects of the most CCW vs. most CW resting postural  
237 forces are inconsistent: in one case there is a tendency for increased deviation when the resting postural  
238 force is aligned with (filled circles) instead of opposing (open circles) the pulse, and in the other case it is  
239 the other way round.

240

241 However, this across-subject analysis may mask within-subject differences. Thus, in a manner  
242 similar to the previous section, we selected, for each patient, the directions where the starting  
243 lateral postural force was most CCW vs. the most CW, and compared the corresponding  
244 deviations. We found no clear effect: when resting postural forces were the most opposed to the  
245 pulse (vs. most aligned with it) there were no clear differences in deviation along the pulse  
246 direction, for neither the CCW pulses ( $1.28 \pm 0.15$  vs.  $1.07 \pm 0.17$ cm,  $t_{15} = 0.93$ ,  $p = 0.36$ ), the CW  
247 pulses ( $1.37 \pm 0.23$  vs.  $1.26 \pm 0.16$ cm,  $t_{15} = 0.40$ ,  $p = 0.69$ ), or with both types of pulses pooled  
248 together (from  $1.16 \pm 0.12$  vs.  $1.32 \pm 0.12$ cm,  $t_{15} = 0.78$ ,  $p = 0.81$ ). In short, we found no evidence  
249 for an interaction between resting postural force biases and the ability to respond to perturbations  
250 that were applied during movement.

### 251 *Resting postural force biases emerged during active holding at the end of movement*

252 Finally, in Experiment 2, we also investigated the relationship between resting postural force  
253 biases and active holding. In 20 out of 96 movements in each block, participants had to hold  
254 steady on the target for an additional 5 to 7 seconds (Figure 7A). During this time, the robot  
255 imposed a 6N force in one of four directions ( $45^\circ$ ,  $135^\circ$ ,  $225^\circ$ ,  $315^\circ$ , as shown in Figure 7B). This  
256 force was gradually applied over two seconds, held at a 6N level for 3-5 seconds, and then  
257 abruptly released, acting to displace the arm in the direction opposite to the original force, as  
258 illustrated in the examples in Figure 7B.

259 Patients showed impaired capacity to resist and recover from this perturbation (the abrupt release  
260 of the imposed force), taking a longer time ( $0.96 \pm 0.05$ s for the paretic side vs.  $0.79 \pm 0.03$ s for the

261 non-paretic side [ $p = 0.014$ ] and  $0.78 \pm 0.06$ s for controls [ $p = 0.04$ ], Figure 7E, left) and traveling  
262 a longer path ( $7.7 \pm 0.7$ cm for the paretic side vs.  $5.9 \pm 0.3$ cm for the non-paretic side [ $p = 0.011$ ]  
263 and  $5.4 \pm 0.5$ cm for controls [ $p = 0.024$ ], Figure 7E, middle) to stabilization; moreover, they deviated  
264 more in the direction of the perturbation ( $3.2 \pm 0.2$ cm for the paretic side vs.  $2.6 \pm 0.1$ cm for the non-  
265 paretic side [ $p = 0.014$ ] and  $2.3 \pm 0.2$  for controls [ $p = 0.0087$ ], Figure 7E, right).

266 To investigate whether resting postural force biases affected the control of actively holding still at  
267 across workspace locations, we performed a within-individual analysis analogous to the one we  
268 used for unperturbed reaches and moving perturbations. We first projected resting postural forces  
269 upon the directions of the static perturbation to assess the component of the resting postural force  
270 that opposed or aligned with the static perturbation. We then selected, for each patient, the two  
271 position/perturbation direction combinations for which these forces were either the most opposed  
272 (Figure 7F, green) to the perturbation or the most aligned (Figure 7F, blue) with it. For these  
273 selected position/perturbation direction combinations, we compared capacity to resist and recover  
274 from the perturbation, and found that this capacity was indeed better when the resting postural  
275 force was in a direction that opposed the perturbation (path traveled to stabilization:  $4.4 \pm 1.2$ cm  
276 vs.  $6.9 \pm 1.0$ cm,  $p = 0.0198$ ; time to stabilization:  $0.7 \pm 0.1$ s vs.  $1.0 \pm 0.1$ s,  $p = 0.0023$ ; maximum  
277 deviation:  $1.9 \pm 0.4$ cm vs.  $3.2 \pm 0.4$ cm,  $p = 0.0003$ , corresponding to cases with the most opposed  
278 vs. the most aligned resting postural force). In short, our perturbations revealed that resting flexor  
279 biases switched on after movement was over, providing evidence for separate control between  
280 moving and holding still.

### 281 *Resting postural force biases and abnormal synergies*

282 The observation, from Experiment 1, that resting postural force biases are reduced by external  
283 arm support bears parallels to the same effect of arm support upon abnormal synergies active  
284 during movement (Sukal, Ellis, and Dewald 2007). Yet, Experiment 2 found no relationship  
285 between resting postural force biases and active movement control. To further investigate this  
286 apparent paradox, we examined the relationship between resting postural force biases and  
287 abnormal synergies in further detail. To assess the level of synergy abnormalities for each patient,  
288 we measured their Fugl-Meyer scores for the upper extremity (FM-UE), a scale which was  
289 designed to capture abnormal muscle synergy after stroke (Fugl-Meyer et al. 1975; Brunnstrom  
290 1966) and closely corresponds to EMG-based synergy measures (Bourbonnais et al. 1989).

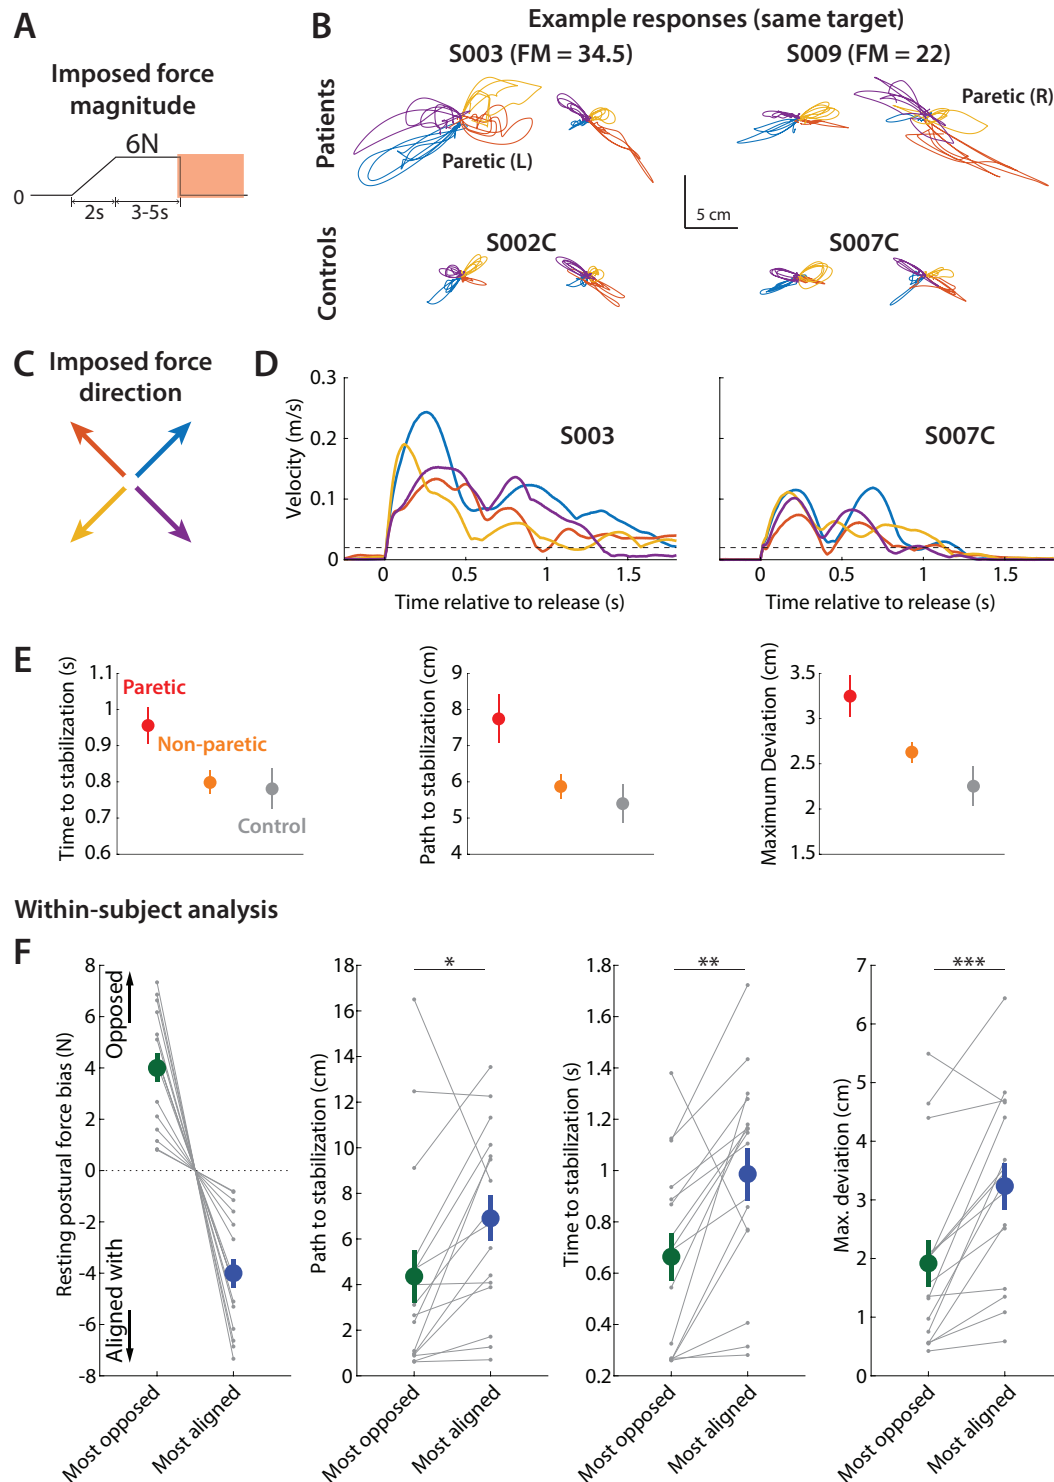

291

292 **Figure 7: Responses to static perturbations and their relationship to resting postural forces. A:** Time course  
 293 of the perturbation. **B:** Example responses (all for the same position in the workspace) from two patients  
 294 (top row) and two controls (bottom row). **C:** Corresponding imposed force directions, the abrupt removal of

295 which perturbs the movement in the opposite direction (compare with B). **D**: Examples of tangential velocity  
296 profiles after the sudden release to the imposed hand force, averaged for all trials at the same position for  
297 each participant. Dashed line indicates the 2cm/s threshold used to assess time to stabilize. Left; example  
298 patient (paretic side); Right; example control. Colors correspond to different directions of the imposed hand  
299 force. **E**: Summary of performance metrics after the perturbation for the paretic and non-paretic side of  
300 patients and healthy controls. **F**: Within-subject analysis of the relationship between resting postural forces  
301 in the direction of the perturbation vs. performance against the perturbation. For each individual, we  
302 selected the two position/perturbation direction combinations for which resting postural forces were either  
303 the most opposed (green) to the perturbation or the most aligned (blue) with it. From left to right: forces in  
304 selected position/perturbation direction combinations; corresponding path traveled to stabilization;  
305 corresponding time to stabilization; corresponding maximum deviation. This analysis suggests that  
306 restoring hand position after the perturbation is indeed easier when resting postural forces opposed, rather  
307 than were aligned with, the perturbation. Gray dots indicate individual data; colored dots and errorbars  
308 indicate mean $\pm$ SEM.

309

310 We entered patients' resting postural bias magnitudes into a mixed-effects ANOVA with FM-UE  
311 (continuous), Proximity (distal: the three locations furthest from the body, proximal: the two  
312 locations closest to the body, Figure 8, top left) and Support (with air sled, without air sled) as  
313 factors, evaluating for main effects and interactions. All factors showed significant main effects,  
314 with resting postural force magnitudes decreasing with FM-UE ( $R^2 = 0.30$ ,  $p < 10^{-8}$ ), target  
315 proximity ( $\eta^2 = 0.12$ ,  $p = 0.00003$ ), and weight support ( $\eta^2 = 0.12$ ,  $p = 0.00003$ ). Significant  
316 interactions were observed between FM-UE and both Support ( $p=0.0055$ ) and Proximity  
317 ( $p=0.0037$ ), with Support and Proximity becoming more important for lower FM-UE scores (i.e.  
318 higher overall motor impairment / higher synergy intrusion) as illustrated in Figure 8.

319 In summary, we made three key observations on abnormal resting postural force biases. First,  
320 like abnormal synergies, they were exaggerated when active arm support was required. Second,  
321 they were higher in more distal positions where the elbow would tend to be extended; if patients  
322 were to actively reach to the same locations, they would have faced increased intrusion of flexor  
323 synergy. Third, they scaled with the synergy-based FM-UE. These observations thus suggest a  
324 common mechanism behind resting postural force biases and abnormal synergies.



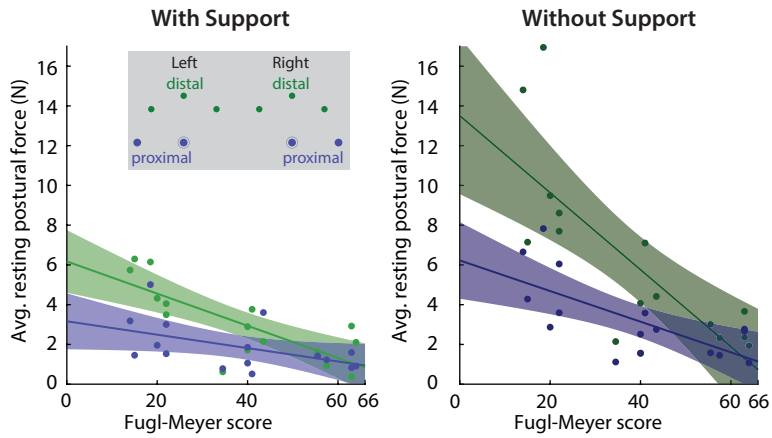

325

326 **Figure 8.** Across-patient relationships of FM-UE (/66, higher scores indicating lower impairment) and  
327 resting postural force magnitudes, for distal (green) and proximal (blue) target positions, with (left) and  
328 without support (right). Note the strong effects of arm support, proximity, and FM-UE. Lines indicate linear  
329 fits; shading indicates 95% confidence interval for each fit.

## 330 **Discussion**

331 We assessed abnormal resting posture in stroke patients by measuring the resting force biases  
332 they involuntarily exerted while their arm was held at different points within a planar workspace  
333 (Experiment 1). We found that these resting postural force biases were strongest in more distal  
334 positions of the arm, generally pulling the arm toward a flexed position, and were significantly  
335 reduced when the arm muscles were relieved of the need to support the weight of the arm. We  
336 then proceeded to assess reaching and holding control in the same workspace (Experiment 2)  
337 and examined whether resting postural forces could partially account for deficits in the motor  
338 control of reaching and holding still in the same patients. Remarkably, these resting postural force  
339 biases did not seem to have a detectable effect upon any component of active reaching but only  
340 emerged during the control of holding still after the movement ended. These results suggest a  
341 clear dissociation between the control of movement and posture. At the same time, assessing  
342 patients' impairment using the FM-UE, a metric designed to measure for abnormal synergies  
343 during 3D arm movements, revealed a strong association between resting force biases and  
344 abnormal movement synergies; which raises the possibility that the observed dissociation of  
345 movement and posture control for planar weight-supported movements may break down for  
346 unsupported 3D arm movements. This dissociation raises interesting questions about both the  
347 neural architecture supporting it and approaches to rehabilitation of the post-stroke arm.

### 348 *Dissociation between reaching and holding still*

349 Previous research provides evidence for a separate control of reaching and holding in the healthy  
350 arm – for a review, see (Shadmehr 2017) and (Jayasinghe, Scheidt, and Sainburg 2022). For  
351 example, following visuomotor rotation training specific to the move phase using an out-and-back  
352 movement, participants did not transfer this rotation to holding still after a point-to-point reach in  
353 the same direction: after the movement was over, and visual feedback was removed, participants'  
354 held positions drifted from the rotated movement endpoint towards the baseline hold position  
355 (Scheidt and Ghez 2007). There is also neurophysiological evidence for separate control of  
356 moving and holding still. A previous study found populations of neurons in the macaque M1 that  
357 represent mechanical loads during posture or movement but not both (Kurtzer, Herter, and Scott  
358 2005) whereas another recorded both cortical neurons and spinal interneurons and found that  
359 they coded parameters related to movement vs. posture maintenance, respectively (Shalit et al.  
360 2012).

361 The dissociation reported here between the control of reaching and holding still in the post-stroke  
362 arm is consistent with a recently proposed hybrid model, which posits distinct controllers for

363 reaching and for bringing the arm to a stop\_(Jayasinghe, Scheidt, and Sainburg 2022). Our finding  
364 that resting posture control does not interact either with the initial reach or bringing the arm to a  
365 stop extends this idea, suggesting *three* distinct controllers: one for the initial reach; another for  
366 bringing the arm to a stop; and another for control of holding still at the endpoint after movement  
367 is over. It should be noted, however, that having distinct neural circuits for reaching and holding  
368 does not rule out interactions between the two. For example, in parallel to the control of saccadic  
369 eye movements, the holding circuit may integrate information from the moving circuit; we recently  
370 found evidence for this in both healthy participants and patients with hemiparesis (Albert et al.  
371 2020).

### 372 *Potential causes of abnormal resting flexor biases*

373 How are resting postural biases generated? One possibility would be abnormally low thresholds  
374 of the stretch reflex (Levin and Feldman 1994). Passively extending the elbow, even at low speeds  
375 – something Experiment 1 did – can lead to increased muscle activity which may persist long after  
376 the end of movement (Levin et al. 2000; Kanade-Mehta et al. 2022). Alternatively, Experiment 1  
377 revealed a number of parallels between resting postural force biases and abnormal synergies: a  
378 propensity for flexion, mitigation by arm weight support and, a significant correlation between  
379 patients' resting postural force biases and their FM-UE scores – a measure designed to assess  
380 the post-stroke abnormal synergies that manifest during active movement. These similarities raise  
381 the possibility that post-stroke resting postural biases and movement synergies share a  
382 generative mechanism. Consistent with this possibility is the finding that externally-imposed elbow  
383 flexion led to (involuntary) shoulder flexion and external adduction in stroke patients but not  
384 healthy controls, suggesting abnormal synergy patterns do not require active voluntary movement  
385 to be expressed (Sangani et al. 2007)– also (Schmit and Rymer 2001).

386 It has been proposed that abnormal resting posture after brain injury can be ascribed to an  
387 extrapyramidal system (i.e., other than the corticospinal tract, CST) (Denny-Brown 1964).  
388 Consistent with this suggestion, multiple lines of evidence from animal models point towards  
389 reticulospinal tract (RST) involvement in postural control (Takakusaki 2017; Deliagina et al. 2007;  
390 Lacquaniti et al. 1997). Lesions of the monkey ponto-medullary reticular formation resulted in  
391 abnormal postures; notably, these were characterized by trunk and limb flexion, elevated  
392 shoulders, and arms held close to the body (Lawrence and Kuypers 1968) mirroring the flexor  
393 posture pattern seen after stroke. Several studies in cats also suggest a postural role for the  
394 reticulospinal tract. Reticular formation neurons respond to vestibular inputs such as head tilts or  
395 whole-body tilts, in line with a role in adjusting posture against gravity (Bolton et al. 1992;

396 Pompeiano et al. 1984; Matsuyama and Drew 2000). Electrical and chemical stimulation of the  
397 reticular formation leads to modulations in muscle tone (Takakusaki et al. 2016), and  
398 reticulospinal neurons display tonic activity patterns related to postural adjustments that precede  
399 movement, rather than the movement itself (Schepens and Drew 2004).

400 There is also recent evidence that the RST is the descending system responsible for the  
401 generation of large forces during voluntary movement (Tapia et al. 2022; Glover and Baker 2022).  
402 Thus, the RST may control posture and force production in the upper limb. Upregulation of the  
403 RST has also been implicated in the generation of abnormal movement synergies after stroke.  
404 For example, the ipsilateral RST can facilitate flexors but suppress extensors, a pattern mirroring  
405 the flexor synergy (Davidson and Buford 2004; Davidson, Schieber, and Buford 2007).

406 There appears to be a contradiction, however, between the idea that abnormal postures share a  
407 common mechanism with abnormal movement synergies, and our finding that there was no  
408 evidence for intrusion of resting biases into any aspect of active reaching. A potential explanation  
409 for this apparent contradiction is that our experiments were conducted on a 2D surface with weight  
410 support. In contrast, the FM-UE scale, a synergy-based measure, is performed by patients in 3D  
411 without weight support. It has been shown that for 3D reaching, patients with chronic stroke  
412 express intrusive flexor synergies (Zackowski et al. 2004). Weight support – as was used in  
413 Experiment 2 – also reduces intrusion of flexor synergies for planar movements (Sukal, Ellis, and  
414 Dewald 2007) and improves planar kinematics (Beer et al. 2004; 2007). Earlier work in a weight-  
415 supported planar task found similar degrees of reaching abnormality whether movements were  
416 made in or out of synergy (Levin 1996); more recently, we showed that reaching dexterity can be  
417 dissociated from synergy intrusion when arm support is provided (Hadjiosif et al. 2022). Thus,  
418 while resting flexor biases and movement-related flexor synergies are both reduced by full weight  
419 support, synergies seem to be more so. This is not inconsistent with positing a shared substrate  
420 for the abnormalities at rest and during movement, but this substrate might play more of a role in  
421 holding still than in moving, and so the consequences of when it is damaged may be more  
422 apparent in a task that stresses holding still over movement. We suggest a putative framework  
423 below.

424 We posit that the motor system has separable functional modes for moving vs. holding still and  
425 that this is accomplished by differentially weighting the contributions of descending systems that  
426 are operative in both modes (Figure 9). The CST is weighted more towards fast and fractionated  
427 control during movement, the RST, in contrast, is weighted more towards slower postural control

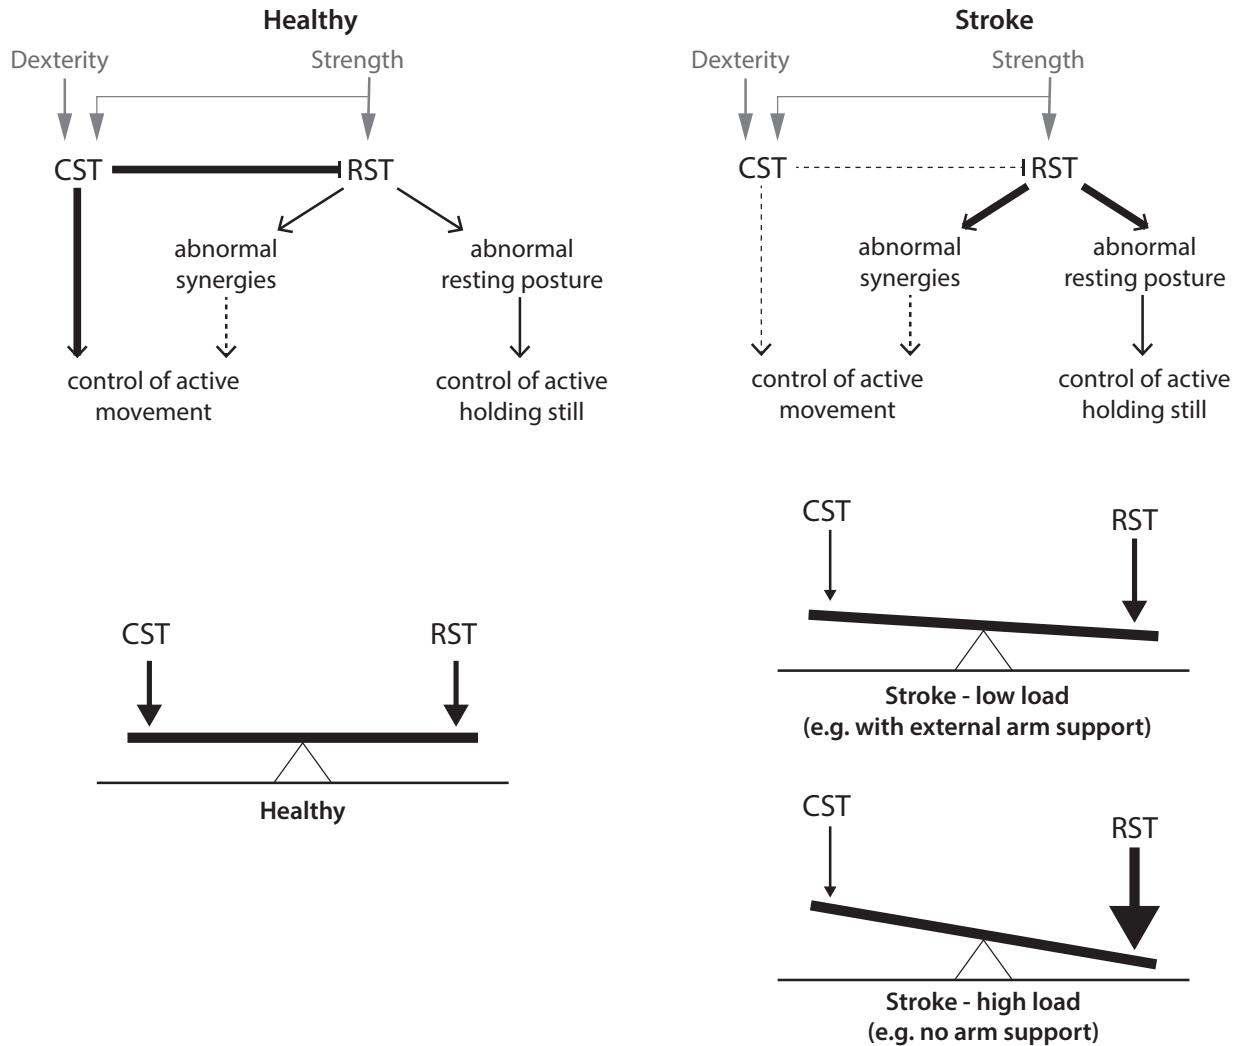

428

429 **Figure 9:** An architecture for the separable control of reaching and holding and spillover effects in stroke.

430

431 and generation of large isometric forces. In healthy individuals, these two modes are kept in  
 432 balance by the CST, which has a moderating influence on the RST (Schepens and Drew 2006)  
 433 (Figure 9, left). In this framework, the CST is the controller during movement and the modulator  
 434 during holding still.

435 Damage to the CST after stroke reduces its moderating influence upon the RST (Figure 9, right);  
 436 influence that is likely further compromised by upregulation of the RST through plasticity  
 437 mechanisms (Zaaimi et al. 2012; García-Alías et al. 2015). This model can explain our results as  
 438 follows: As the CST is the dominant system during movement it can still modulate the RST in this  
 439 mode, especially with weight support, as this reduces RST drive, with the consequence that

440 resting biases do not markedly contaminate active movement. Conversely, the RST is the  
441 dominant system for postural control, and it can overcome CST modulation, which leads to the  
442 resting biases we observed. Thus, weight support allows a weakened CST to keep moving  
443 protected from abnormal holding, but it cannot prevent abnormal holding itself. The interesting  
444 implication of this model is that synergies are in fact spillover into movement of postural  
445 abnormalities when the CST can no longer modulate increased RST activation, for example in  
446 the case when weight support is removed.

447 A side question is how the control of decelerating to a stop – which we show here is distinct from  
448 the control of holding still after the movement is over – fits within such a scheme. A recent saccade  
449 study found that deceleration may be controlled through the cerebellum (Sedaghat-Nejad et al.  
450 2022). In reaching tasks in the mouse, activity in the interpositus nucleus scaled with limb  
451 deceleration (Becker and Person 2019) whereas disruption of the pontine nuclei did not impair  
452 movement initiation as much as components related to bringing the movement to a stop such as  
453 success, endpoint position, and endpoint variance (Guo et al. 2021).

454 Increased recruitment of the RST has also been implicated in power grip (Baker and Perez 2017;  
455 Tazoe and Perez 2017). This may be relevant to our study, as our task had participants actively  
456 grasp the handle of the robot for both Experiments 1 and 2. If increased RST recruitment indeed  
457 explains abnormal resting postural biases as we discussed in the previous section, a stronger  
458 grasp would in turn increase the strength of these biases even further. Moreover, the intermixing  
459 of free-reaching and perturbation trials in Experiment 2 could have led to increased uncertainty in  
460 environmental dynamics; uncertainty can lead to adjustments such as even stronger grip  
461 (Hadjiiosif and Smith 2015). Yet, despite this potential additional RST recruitment, we found that  
462 resting biases did not affect active reaching and only switched on after the reach was over;  
463 detected when we applied a perturbing hand force. This result lends further support for separate  
464 controllers for reaching vs. holding still.

### 465 *Conclusions*

466 Our examination of the interplay between abnormalities in moving and holding still in patients  
467 making planar reaching movements suggests the existence of two functional modes of control,  
468 likely constructed out of differing configurations of the CST and the RST. The components of the  
469 paretic syndrome – loss of dexterity, weakness, abnormal resting posture, and intrusive synergies  
470 provide insight into how a normal movement is assembled by descending systems. To the degree  
471 that hemiparesis is a consequence of the CST losing, to varying degrees, both its direct control

472 over motor neurons and its modulatory influence on the RST, then physiological and behavioral  
473 interventions may need to target these components separately.

## 474 **Materials and Methods**

### 475 *Participants and Ethics Statement*

476 A convenience sample of 16 stroke patients (age:  $58.5 \pm 17.8$  [average  $\pm$  standard deviation], 9  
477 female) and 9 age-range matched healthy control participants (age:  $62.6 \pm 15.2$ , 6 female) were  
478 recruited for this study. Table 1 shows details for each patient whereas Table 2 shows summary  
479 demographics and assessment metrics for patients and controls. Procedures were approved by  
480 the Johns Hopkins Institutional Review Board, and participants provided written informed consent.

### 481 *Eligibility criteria*

482 We recruited patients with hemiparesis due to stroke. To be eligible for the study, participants had  
483 to be adult, exhibit some movement with the affected arm, and be able to provide informed  
484 consent and understand the tasks involved. Exclusion criteria were marked cognitive impairment  
485 (assessed based on the Montreal Cognitive Assessment, MoCA, cutoff of 20); severe aphasia or  
486 ideomotor apraxia, neglect or hemianopia; and orthopedic or pain issues.

### 487 *Task Details*

488 Participants were seated on a chair and grasped the handle of a robotic arm; the handle moved  
489 either passively (by itself, Experiment 1) or actively (by the participant, Experiment 2) on the  
490 horizontal plane. In Experiment 2 and in two out of four conditions of Experiment 1, participants'  
491 lower arm was supported using a custom-made air-sled (Figure 1C). Above the plane was a  
492 screen which blocked direct vision of the arm; on this opaque screen we continuously projected  
493 a cursor indicating hand position (diameter: 3 mm), as well as the currently active target (diameter:  
494 10 mm). Handle position was recorded at 200Hz, whereas subject-produced forces on the handle  
495 were recorded using a 6-axis force transducer. Experiments typically began with the paretic arm  
496 (see specific details below); for healthy controls, an arm was randomly assigned as primary, with  
497 its schedule matching that of the paretic arm in stroke patients.

### 498 *Experiment 1: Measuring resting postural abnormalities*

499 Following a previous paradigm (Simo et al. 2013; Laczko et al. 2017), Experiment 1 assessed  
500 resting postural forces by passively moving participants to different positions in the 2D workspace  
501 and holding them still in each position while it measured the forces they inadvertently exerted.  
502 Participants were instructed to maintain grasp on the robotic handle but otherwise rest and not  
503 resist the robot's motion as it slowly (5s movement time) moved from one position to the next and  
504 held them still (5s more). The array of positions (see Figure 1) could vary from one participant to  
505 the next and consisted of 18 - 22 positions (see exception below), whereas each position was



506 visited three times. During the passive moving and holding, a 3 mm white cursor indicating handle  
507 position and a 10 mm yellow disk indicating the destination of the passive movement were  
508 displayed. Though not essential from the participant's point of view, this allowed the experimenter  
509 to monitor the status of the experiment.

510 Each participant completed 4 blocks, two with each arm and in each arm support condition (air  
511 sled, no air sled); the typical order was {paretic, no support} -> {non-paretic, no support} ->  
512 {paretic, air sled support} -> {non-paretic, air sled support}; however in four individuals we  
513 completed the two paretic blocks first as their hand had to be secured to the handle (with self-  
514 adherent wrap) for a stable grasp.

515 In one patient, due to high resistance to passive moving and holding when air sled support was  
516 not provided, we were only able to measure resting postural forces in only 5 points under the  
517 no-air sled condition (the 5 points used to summarize the data).

518 Each block typically took less than 10 minutes to complete, with Experiment 1 lasting about 40  
519 minutes including breaks.

#### 520 *Experiment 2: Assessing reaching control*

521 In the same workspace as Experiment 1, Experiment 2 assessed motor control in a reaching task.  
522 Participants made 10-cm point-to-point reaches within an array of 5 targets (diameter: 10mm)  
523 within the workspace (Figure 4A), sampling 8 different movement directions. A white cursor  
524 (diameter: 3mm), indicating hand position, was visible throughout the experiment. Participants  
525 were instructed to try and stop at each target within a 600-800ms window after movement onset.  
526 At the end of movement, feedback was provided to indicate whether they were too fast (time  
527 <600ms, target turning red), too slow (time>800ms, target turning blue), or within the right time  
528 range (target "exploding" with a chirping sound).

529 The experiment was divided into blocks of 96 movements each (12 in each of the 8 movement  
530 directions). It began with three blocks with the paretic arm, followed by three more with the non-  
531 paretic arm, two more with the paretic arm, and ending with two blocks with the non-paretic arm.  
532 The first block with each arm was a familiarization block. Arm support (air sled) was provided  
533 throughout the experiment, and breaks were given between blocks.

534 Except for two participants, who performed Experiment 1 and Experiment 2 on different days due  
535 to limitations in their schedule, the entirety of each session – consisting of Experiment 1,  
536 Experiment 2 and standard assessments - took place on the same day and typically lasted about  
537 3.5 hours with breaks given between the blocks as necessary.

538 Most trials (two-thirds) consisted of unperturbed movements to assess reaching control. In the  
539 remaining third of reaches, a 12N, 70 ms bell-shaped force pulse was applied by the robot lateral  
540 to the movement direction (Smith and Shadmehr 2005) after participants reached 2cm away from  
541 the starting position. On half of these trials the perturbation was oriented leftwards with respect to  
542 the movement (counterclockwise pulse) and the other half rightwards (clockwise pulse).

543 A fraction of trials in each block (20/96) imposed a static perturbation after movement in order to  
544 assess active holding control. For these trials, the holding time at the target was extended by 5 to  
545 7 seconds, during which participants were instructed to hold still on the target (to remind them,  
546 the word “HOLD” were shown close to the target). During this extended hold period, a 6N force  
547 was gradually imposed over 2s in one of four different directions (45°, 135°, 225°, 315°), held  
548 constant for a pseudorandom time interval uniformly ranging from 3 to 5 seconds, and then  
549 abruptly released. Each block presented each position/static perturbation direction combination  
550 exactly once.

#### 551 *Data Analysis*

552 Analysis was performed using MATLAB (Mathworks, Natick MA). For Experiment 1, we averaged  
553 resting postural forces within the latter 4s of the 5s passive holding period for each trial. To ensure  
554 forces were relatively stable and any movement minimal during the averaging window, the exact  
555 window could be further adjusted based on visual inspection of force and position traces. To  
556 obtain a measure of the average resting postural force at each position for each individual, we  
557 further averaged forces across the three visits to the same position. For comparisons, we focused  
558 on resting postural forces on the 5 positions shown in Figure 2; these forces were obtained directly  
559 (when the exact positions were sampled for the individual) or through interpolation (7/16 patients  
560 and 3/9 controls).

561 For Experiment 2, movement onset was defined as the moment in which participants' velocity  
562 away from the starting position exceeded 3.5 cm/s, whereas movement end was defined as the  
563 moment the participant was within the target and moving at a speed of less than 3.5 cm/s. Initial  
564 reaching angles were calculated between movement onset and 150ms later; endpoint reaching  
565 angles were calculated between the moment the participant first reached within 2cm of the target  
566 and 150ms later. In pulse trials, settling time was defined as the time taken from pulse onset to  
567 the first moment absolute lateral velocity dipped below 2cm/s and remained below that amount  
568 for at least 100ms (or the movement ended). In static perturbation trials, settling time was defined  
569 as the time taken from perturbation onset (release of holding force) to the moment when velocity

570 dipped below 2cm/s (and remained below that amount for at least 100ms) and the distance from  
571 the target was less than 2cm.

#### 572 *Data exclusion criteria*

573 In Experiment 1, some trials (1.49%) were flagged as erroneous after visual inspection of force  
574 profiles, in cases where forces appeared unstable and/or substantial movement was detected  
575 during the period in which the robot was to hold the handle still at each measurement position.

576 In Experiment 2, we excluded as outliers movements in which initial movement direction (150ms  
577 after movement onset) was  $\geq 90^\circ$  away from target direction. This excluded 0.95% of patients'  
578 movements and 0.33% of controls' movements.

579 Moreover, in some hold perturbation trials (Figure 7), patients took a long time to reach the  
580 stabilization criterion described in the previous section; mistakenly, our setup limited its recording  
581 time to only the first 2s after force release. The exact time to stabilization thus could not be  
582 measured for these particular trials, so they had to be excluded from analysis. Though only  
583  $13.2 \pm 3.3\%$  (mean  $\pm$  SEM) of paretic stabilization trials were thus excluded in the patient population  
584 ( $1.4 \pm 0.4\%$  in their non-paretic side,  $0.4 \pm 0.4\%$  [2 trials] in controls), there were three patients for  
585 which excluded trials were 25% or more of all paretic trials. To ensure there are no systematic  
586 effects of this issue, we repeated the analysis of Figure 7G (a) by excluding these three patients  
587 altogether or (b) by assigning a value of 2.0 seconds to the affected trials. In both cases, we found  
588 results similar to our main analysis (Figure S1).

#### 589 *Statistical comparisons*

590 In Experiment 1, we used an ANOVA to investigate any effect of conditions {Position  
591 (distal/proximal), Support (with/without air sled), FM-UE (continuous)} and their interactions. We  
592 used paired t-tests for the within-subject comparisons in Experiment 2.

#### 593 *Fugl-Meyer assessments*

594 Assessments were separately scored by AMH and KK with scores subsequently averaged (hence  
595 some scores having decimal values). For cases of substantial score differences (3 points or more)  
596 scores were again reviewed by both raters together.

#### 597 *Acknowledgements*

598 We would like to thank Stuart Baker for helpful discussions. AMH and KK were supported by the  
599 Sheikh Khalifa Stroke Institute.

| ID   | Age (5y range) | Sex | Time since stroke | Handedness | Paretic arm | FM-UE (/66) | ARAT (/57) |
|------|----------------|-----|-------------------|------------|-------------|-------------|------------|
| S001 | 76-80          | M   | 2y                | Right      | Left        | 57.5        | 57         |
| S002 | 51-55          | M   | 6y                | Right      | Left        | 40          | 47.5       |
| S003 | 66-70          | F   | 7y                | Right      | Right       | 34.5        | 19         |
| S004 | 26-30          | F   | 5y                | Right      | Left        | 55.5        | 43.5       |
| S005 | 76-80          | M   | 13mo              | Right      | Right       | 43.5        | 34         |
| S007 | 51-55          | F   | 2mo               | Left       | Right       | 63          | 57         |
| S008 | 51-55          | F   | 14mo              | Right      | Left        | 41          | 25         |
| S009 | 56-60          | F   | 5y                | Right      | Left        | 22          | 3          |
| S010 | 66-70          | M   | 5y                | Right      | Left        | 20          | 12         |
| S011 | 41-45          | F   | 20mo              | Right      | Right       | 64          | 57         |
| S012 | 46-50          | M   | 6y                | Right      | Left        | 18.5        | 6.5        |
| S013 | 66-70          | M   | 9y                | Right      | Left        | 14          | 8          |
| S014 | 41-45          | F   | 16mo              | Right      | Left        | 40          | 39.5       |
| S015 | 61-65          | F   | 10y               | Right      | Left        | 22          | 4.5        |
| S016 | 36-40          | F   | 21mo              | Amb.       | Right       | 62.5        | 57         |
| S017 | 46-50          | M   | 3mo               | Right      | Left        | 15          | 3          |

600

601 **Table 1.** *Patient characteristics.* FM-UE: Fugl-Meyer Assessment for the Upper Extremity; ARAT: Action  
602 Research Arm Test.

|                   | <b>Stroke patients</b> | <b>Controls</b> |
|-------------------|------------------------|-----------------|
| N                 | 16                     | 9               |
| Age               | 58.5±17.8              | 62.6±15.2       |
| Gender            | 7M/9F                  | 3M/6F           |
| Paretic side      | 11L/5R                 | n/a             |
| FM-UE             | 38.3±18.2              | 66.0±0.0        |
| ARAT              | 29.6±21.8              | 57.0±0.0        |
| MoCA              | 24.9±3.1               | 28.1±1.6        |
| Time since stroke | [2mo,10y]              | n/a             |

603

604 **Table 2.** *Summary of patient and control characteristics.* FM-UE: Fugl-Meyer Assessment for the Upper  
605 Extremity (/66); ARAT: Action Research Arm Test (/57). MoCA: Montreal Cognitive Assessment (/30).  
606 Here, ± indicates standard deviation.

## 607 Bibliography

- 608 Albert, Scott T, Alkis M Hadjiosif, Jihoon Jang, Andrew J Zimnik, Demetris S Soteropoulos, Stuart N  
609 Baker, Mark M Churchland, John W Krakauer, and Reza Shadmehr. 2020. "Postural Control of  
610 Arm and Fingers through Integration of Movement Commands." *Elife* 9.
- 611 Baker, Stuart N, and Monica A Perez. 2017. "Reticulospinal Contributions to Gross Hand Function after  
612 Human Spinal Cord Injury." *Journal of Neuroscience* 37 (40): 9778–84.
- 613 Becker, Matthew I, and Abigail L Person. 2019. "Cerebellar Control of Reach Kinematics for Endpoint  
614 Precision." *Neuron* 103 (2): 335–48.
- 615 Beer, Randall F, Julius PA Dewald, Michelle L Dawson, and W Zev Rymer. 2004. "Target-Dependent  
616 Differences between Free and Constrained Arm Movements in Chronic Hemiparesis."  
617 *Experimental Brain Research* 156 (4): 458–70.
- 618 Beer, Randall F, Michael D Ellis, Bradley G Holubar, and Julius PA Dewald. 2007. "Impact of Gravity  
619 Loading on Post-stroke Reaching and Its Relationship to Weakness." *Muscle & Nerve: Official  
620 Journal of the American Association of Electrodiagnostic Medicine* 36 (2): 242–50.
- 621 Bobath, B. 1982. "Adult Hemiplegia: Evaluation and Treatment, 2nd Edn. London: Spottiswoode  
622 Ballantyne." *Physiotherapy in Disorders of the Brain*.
- 623 Bolton, PS, T Goto, RH Schor, VJ Wilson, Y Yamagata, and BJ Yates. 1992. "Response of  
624 Pontomedullary Reticulospinal Neurons to Vestibular Stimuli in Vertical Planes. Role in Vertical  
625 Vestibulospinal Reflexes of the Decerebrate Cat." *Journal of Neurophysiology* 67 (3): 639–47.
- 626 Bourbonnais, Daniel, SHARYN VANDEN NOVEN, Kathleen M Carey, and William Z Rymer. 1989.  
627 "Abnormal Spatial Patterns of Elbow Muscle Activation in Hemiparetic Human Subjects." *Brain*  
628 112 (1): 85–102.
- 629 Brunnstrom, Signe. 1966. "Motor Testing Procedures in Hemiplegia: Based on Sequential Recovery  
630 Stages." *Physical Therapy* 46 (4): 357–75.
- 631 Carr, EK, and FD Kenney. 1992. "Positioning of the Stroke Patient: A Review of the Literature."  
632 *International Journal of Nursing Studies* 29 (4): 355–69.
- 633 ———. 1994. "Observing Seated Posture after Stroke: A Reliability Study." *Clinical Rehabilitation* 8 (4):  
634 329–33.
- 635 Davidson, Adam G, and John A Buford. 2004. "Motor Outputs from the Primate Reticular Formation to  
636 Shoulder Muscles as Revealed by Stimulus-Triggered Averaging." *Journal of Neurophysiology* 92  
637 (1): 83–95.
- 638 Davidson, Adam G, Marc H Schieber, and John A Buford. 2007. "Bilateral Spike-Triggered Average  
639 Effects in Arm and Shoulder Muscles from the Monkey Pontomedullary Reticular Formation."  
640 *Journal of Neuroscience* 27 (30): 8053–58.
- 641 Deliagina, Tatiana G, Pavel V Zelenin, Irina N Beloozerova, and Grigori N Orlovsky. 2007. "Nervous  
642 Mechanisms Controlling Body Posture." *Physiology & Behavior* 92 (1–2): 148–54.
- 643 Denny-Brown, D. 1964. "The Extrapyrmidal System and Postural Mechanisms." *Clinical Pharmacology &  
644 Therapeutics* 5 (6part2): 812–27.
- 645 Fugl-Meyer, Axel R, L Jääskö, Ingegerd Leyman, Sigyn Olsson, and Solveig Steglind. 1975. "The Post-  
646 Stroke Hemiplegic Patient. 1. a Method for Evaluation of Physical Performance." *Scandinavian  
647 Journal of Rehabilitation Medicine* 7 (1): 13–31.
- 648 García-Álías, Guillermo, Kevin Truong, Prithvi K. Shah, Roland R. Roy, and V. Reggie Edgerton. 2015.  
649 "Plasticity of Subcortical Pathways Promote Recovery of Skilled Hand Function in Rats after  
650 Corticospinal and Rubrospinal Tract Injuries." *Experimental Neurology* 266 (April): 112–19.  
651 <https://doi.org/10.1016/j.expneurol.2015.01.009>.
- 652 Garland, S Jayne, Vicki L Gray, and Svetlana Knorr. 2009. "Muscle Activation Patterns and Postural  
653 Control Following Stroke." *Motor Control* 13 (4): 387–411.
- 654 Ghez, Claude, Robert Scheidt, and Hank Heijink. 2007. "Different Learned Coordinate Frames for  
655 Planning Trajectories and Final Positions in Reaching." *Journal of Neurophysiology* 98 (6): 3614–  
656 26. <https://doi.org/10.1152/jn.00652.2007>.
- 657 Glover, Isabel S., and Stuart N. Baker. 2022. "Both Corticospinal and Reticulospinal Tracts Control Force  
658 of Contraction." *The Journal of Neuroscience* 42 (15): 3150.  
659 <https://doi.org/10.1523/JNEUROSCI.0627-21.2022>.

- 660 Guo, Jian-Zhong, Britton A Sauerbrei, Jeremy D Cohen, Matteo Mischiati, Austin R Graves, Ferruccio  
661 Pisanello, Kristin M Branson, and Adam W Hantman. 2021. "Disrupting Cortico-Cerebellar  
662 Communication Impairs Dexterity." *Elife* 10: e65906.
- 663 Hadjosif, Alkis M, Meret Branscheidt, Manuel A Anaya, Keith D Runnalls, Jennifer Keller, Amy J Bastian,  
664 Pablo A Celnik, and John W Krakauer. 2022. "Dissociation between Abnormal Motor Synergies  
665 and Impaired Reaching Dexterity after Stroke." *Journal of Neurophysiology* 127 (4): 856–68.
- 666 Hadjosif, Alkis M., and Maurice A. Smith. 2015. "Flexible Control of Safety Margins for Action Based on  
667 Environmental Variability." *Journal of Neuroscience* 35 (24): 9106–21.  
668 <https://doi.org/10.1523/JNEUROSCI.1883-14.2015>.
- 669 Hannaford, Blake, and Lawrence Stark. 1985. "Roles of the Elements of the Triphasic Control Signal."  
670 *Experimental Neurology* 90 (3): 619–34. [https://doi.org/10.1016/0014-4886\(85\)90160-8](https://doi.org/10.1016/0014-4886(85)90160-8).
- 671 Jayasinghe, Shanie AL, Robert A Scheidt, and Robert L Sainburg. 2022. "Neural Control of Stopping and  
672 Stabilizing the Arm." *Frontiers in Integrative Neuroscience* 16.
- 673 Kanade-Mehta, Priyanka, Maria Bengtson, Tina Stoeckmann, John McGuire, Claude Ghez, and Robert A  
674 Scheidt. 2022. "Spatial Mapping of Posture-Dependent Resistance to Passive Displacement of  
675 the Hypertonic Arm Post-Stroke." *BioRxiv*, January, 2022.11.13.516311.  
676 <https://doi.org/10.1101/2022.11.13.516311>.
- 677 Karst, GM, and Z Hasan. 1991. "Timing and Magnitude of Electromyographic Activity for Two-Joint Arm  
678 Movements in Different Directions." *Journal of Neurophysiology* 66 (5): 1594–1604.
- 679 Kurtzer, Isaac, Troy M Herter, and Stephen H Scott. 2005. "Random Change in Cortical Load  
680 Representation Suggests Distinct Control of Posture and Movement." *Nature Neuroscience* 8 (4):  
681 498–504.
- 682 Lacquaniti, F, C Maioli, NA Borghese, and L Bianchi. 1997. "Posture and Movement: Coordination and  
683 Control." *Archives Italiennes de Biologie* 135 (4): 353–67.
- 684 Laczko, Jozsef, Robert A Scheidt, Lucia S Simo, and Davide Piovesan. 2017. "Inter-Joint Coordination  
685 Deficits Revealed in the Decomposition of Endpoint Jerk during Goal-Directed Arm Movement  
686 after Stroke." *IEEE Transactions on Neural Systems and Rehabilitation Engineering* 25 (7): 798–  
687 810.
- 688 Lawrence, Donald G, and Henricus GJM Kuypers. 1968. "The Functional Organization of the Motor  
689 System in the Monkey: II. The Effects of Lesions of the Descending Brain-Stem Pathways." *Brain*  
690 91 (1): 15–36.
- 691 Lestienne, F. 1979. "Effects of Inertial Load and Velocity on the Braking Process of Voluntary Limb  
692 Movements." *Experimental Brain Research* 35 (3): 407–18.
- 693 Levin, Mindy F. 1996. "Interjoint Coordination during Pointing Movements Is Disrupted in Spastic  
694 Hemiparesis." *Brain* 119 (1): 281–93.
- 695 Levin, Mindy F, and Anatol G Feldman. 1994. "The Role of Stretch Reflex Threshold Regulation in  
696 Normal and Impaired Motor Control." *Brain Research* 657 (1–2): 23–30.
- 697 Levin, Mindy F, Ruud W Selles, Martine HG Verheul, and Onno G Meijer. 2000. "Deficits in the  
698 Coordination of Agonist and Antagonist Muscles in Stroke Patients: Implications for Normal Motor  
699 Control." *Brain Research* 853 (2): 352–69.
- 700 Mani, Saandeep, Pratik K Mutha, Andrzej Przybyla, Kathleen Y Haaland, David C Good, and Robert L  
701 Sainburg. 2013. "Contralesional Motor Deficits after Unilateral Stroke Reflect Hemisphere-  
702 Specific Control Mechanisms." *Brain* 136 (4): 1288–1303.
- 703 Matsuyama, Kiyoji, and Trevor Drew. 2000. "Vestibulospinal and Reticulospinal Neuronal Activity during  
704 Locomotion in the Intact Cat. II. Walking on an Inclined Plane." *Journal of Neurophysiology* 84 (5):  
705 2257–76.
- 706 Pompeiano, O, Diego Manzoni, UC Srivastava, and G Stampacchia. 1984. "Convergence and Interaction  
707 of Neck and Macular Vestibular Inputs on Reticulospinal Neurons." *Neuroscience* 12 (1): 111–28.
- 708 Robinson, DA. 1970. "Oculomotor Unit Behavior in the Monkey." *Journal of Neurophysiology* 33 (3): 393–  
709 403.
- 710 Sainburg, RL, C Ghez, and D Kalakanis. 1999. "Intersegmental Dynamics Are Controlled by Sequential  
711 Anticipatory, Error Correction, and Postural Mechanisms." *Journal of Neurophysiology* 81 (3):  
712 1045–56.
- 713 Sangani, Samir G, Andrew J Starsky, John R McGuire, and Brian D Schmit. 2007. "Multijoint Reflexes of  
714 the Stroke Arm: Neural Coupling of the Elbow and Shoulder." *Muscle & Nerve* 36 (5): 694–703.

- 715 Schaefer, Sydney Y, Kathleen Y Haaland, and Robert L Sainburg. 2009. "Hemispheric Specialization and  
716 Functional Impact of Ipsilesional Deficits in Movement Coordination and Accuracy."  
717 *Neuropsychologia* 47 (13): 2953–66.
- 718 Scheidt, Robert A, and Claude Ghez. 2007. "Separate Adaptive Mechanisms for Controlling Trajectory  
719 and Final Position in Reaching." *Journal of Neurophysiology* 98 (6): 3600–3613.
- 720 Schepens, Bénédicte, and Trevor Drew. 2004. "Independent and Convergent Signals from the  
721 Pontomedullary Reticular Formation Contribute to the Control of Posture and Movement during  
722 Reaching in the Cat." *Journal of Neurophysiology* 92 (4): 2217–38.
- 723 ———. 2006. "Descending Signals from the Pontomedullary Reticular Formation Are Bilateral,  
724 Asymmetric, and Gated during Reaching Movements in the Cat." *Journal of Neurophysiology* 96  
725 (5): 2229–52.
- 726 Schmit, Brian D, and W Zev Rymer. 2001. "Identification of Static and Dynamic Components of Reflex  
727 Sensitivity in Spastic Elbow Flexors Using a Muscle Activation Model." *Annals of Biomedical  
728 Engineering* 29 (4): 330–39.
- 729 Sedaghat-Nejad, Ehsan, Jay S Pi, Paul Hage, Mohammad Amin Fakharian, and Reza Shadmehr. 2022.  
730 "Synchronous Spiking of Cerebellar Purkinje Cells during Control of Movements." *Proceedings of  
731 the National Academy of Sciences* 119 (14): e2118954119.
- 732 Shadmehr, Reza. 2017. "Distinct Neural Circuits for Control of Movement vs. Holding Still." *Journal of  
733 Neurophysiology* 117 (4): 1431–60.
- 734 Shalit, Uri, Nofya Zinger, Mati Joshua, and Yifat Prut. 2012. "Descending Systems Translate Transient  
735 Cortical Commands into a Sustained Muscle Activation Signal." *Cerebral Cortex* 22 (8): 1904–14.
- 736 Simo, L. S., Piovesan, D., Botzer, L., M. Bengston, Ghez, C. P., and Scheidt, R.A. 2013. "Arm Kinematics  
737 during Blind and Visually Guided Movements in Hemiparetic Stroke Survivors." In *Neuroscience  
738 Meeting Planner*, Program No. 652.06/VV4 2013. San Diego, CA: Society for Neuroscience.
- 739 Smith, Maurice A, and Reza Shadmehr. 2005. "Intact Ability to Learn Internal Models of Arm Dynamics in  
740 Huntington's Disease but Not Cerebellar Degeneration." *Journal of Neurophysiology* 93 (5):  
741 2809–21.
- 742 Sukal, Theresa M, Michael D Ellis, and Julius PA Dewald. 2007. "Shoulder Abduction-Induced  
743 Reductions in Reaching Work Area Following Hemiparetic Stroke: Neuroscientific Implications."  
744 *Experimental Brain Research* 183 (2): 215–23.
- 745 Takakusaki, Kaoru. 2017. "Functional Neuroanatomy for Posture and Gait Control." *Journal of Movement  
746 Disorders* 10 (1): 1.
- 747 Takakusaki, Kaoru, Ryosuke Chiba, Tsukasa Nozu, and Toshikatsu Okumura. 2016. "Brainstem Control  
748 of Locomotion and Muscle Tone with Special Reference to the Role of the Mesopontine  
749 Tegmentum and Medullary Reticulospinal Systems." *Journal of Neural Transmission* 123 (7):  
750 695–729.
- 751 Tapia, Jesus A., Takamichi Tohyama, Annie Poll, and Stuart N. Baker. 2022. "The Existence of the  
752 StartReact Effect Implies Reticulospinal, Not Corticospinal, Inputs Dominate Drive to  
753 Motoneurons during Voluntary Movement." *The Journal of Neuroscience* 42 (40): 7634.  
754 <https://doi.org/10.1523/JNEUROSCI.2473-21.2022>.
- 755 Tazoe, Toshiki, and Monica A Perez. 2017. "Cortical and Reticular Contributions to Human Precision and  
756 Power Grip." *The Journal of Physiology* 595 (8): 2715–30.
- 757 Trombly, Catherine A. 1992. "Deficits of Reaching in Subjects with Left Hemiparesis: A Pilot Study." *The  
758 American Journal of Occupational Therapy* 46 (10): 887–97.
- 759 Twitchell, Thomas E. 1951. "The Restoration of Motor Function Following Hemiplegia in Man." *Brain* 74  
760 (4): 443–80.
- 761 Zaaimi, Boubker, Steve A Edgley, Demetris S Soteropoulos, and Stuart N Baker. 2012. "Changes in  
762 Descending Motor Pathway Connectivity after Corticospinal Tract Lesion in Macaque Monkey."  
763 *Brain* 135 (7): 2277–89.
- 764 Zackowski, Kathleen M, AW Dromerick, SA Sahrman, WT Thach, and Amy J Bastian. 2004. "How Do  
765 Strength, Sensation, Spasticity and Joint Individuation Relate to the Reaching Deficits of People  
766 with Chronic Hemiparesis?" *Brain* 127 (5): 1035–46.
- 767
